# Supplementary material for: Gd@C82(OH)22harnesses inflammatory regeneration for osteogenesis of mesenchymal stem cells through JNK/STAT3 signaling pathway
Source: Royal Society of Chemistry journal article supplement (doi:10.1039/c8tb01097h), 2018-01-01
Supplement: c8tb01097h1.pdf [file c8tb01097h1.pdf]

## Supplementary Information

# **Gd@C<sub>82</sub>(OH)<sub>22</sub> harnesses inflammatory regeneration for osteogenesis of mesenchymal stem cells through JNK/STAT3 signaling pathway**

Jiao Lin,<sup>a,c,#</sup> Rong Cai,<sup>a,c,#</sup> Baoyun Sun,<sup>c,d</sup> Jinqun Dong,<sup>c,d</sup> Yuliang Zhao,<sup>a,c</sup> Qing

Miao,<sup>a,b,\*</sup> Chunying Chen,<sup>a,c,\*</sup>

- a. CAS Key Laboratory for Biomedical Effects of Nanomaterials and Nanosafety and CAS Center for Excellence in Nanoscience, National Center for Nanoscience and Technology, Beijing 100190, P. R. China.
- b. Division of Paediatric Surgery, Department of Surgery, Children's Research Institute, Medical College of Wisconsin, 8701 W Watertown Plank Rd, Milwaukee, WI 53226, USA.
- c. University of Chinese Academy of Sciences, Beijing 100049, P. R. China.
- d. CAS Key Laboratory for Biomedical Effects of Nanomaterials and Nanosafety and Key Laboratory for Nuclear Techniques, Institute of High Energy Physics, Beijing 100049, P. R. China.

# Jiao Lin and Rong Cai contributed equally to this work.

\*Correspondence authors:

Prof. Chunying Chen

National Center for Nanoscience and Technology, Chinese Academy of Science

No.11, Beiyitiao Zhongguancun

Beijing 100190, China

Email: chenchy@nanoctr.cn

Phone: +86 10 8254 5560

Fax: +86-10-62656765

Prof. Qing Miao,

Division of Paediatric Surgery, Department of Surgery, Children's Research Institute,  
Medical College of Wisconsin, 8701 W Watertown Plank Rd, Milwaukee, WI 53226,  
USA

Email: miaoq@nanoctr.cn

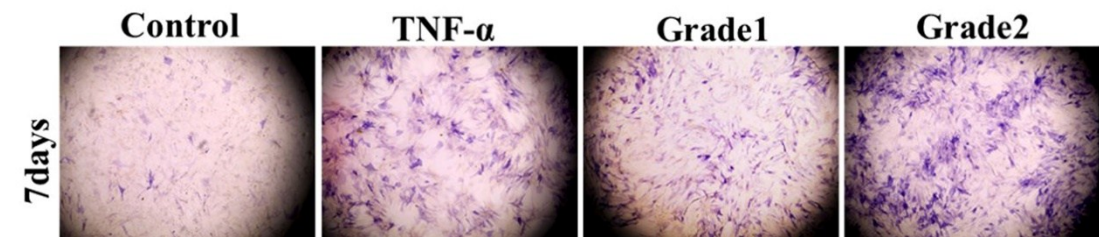

**Figure S1.** The effects of TNF- $\alpha$ , Grade 1 and Grade 2 on osteogenesis of hMSCs. Alkaline phosphatase (ALP) staining was performed, after hMSCs were induced to osteoblasts with the treatment of 10 ng/ml TNF- $\alpha$ , Grade 1 and Grade 2 for 7 days. Inflammatory microenvironment, Grade 1 and Grade 2.

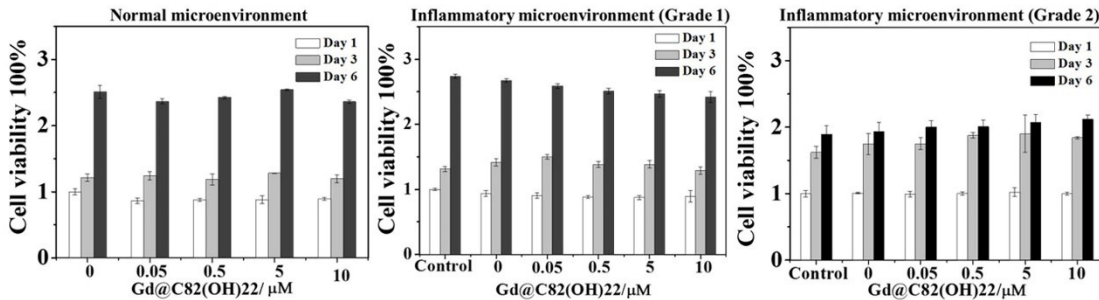

**Figure S2.** Gd@C<sub>82</sub>(OH)<sub>22</sub> have no cytotoxicity of hMSCs in normal

microenvironment (growth medium) and inflammatory microenvironment (Grade 1, Grade 2). After treating hMSCs with 0.05, 0.5, 5, 10  $\mu\text{M}$   $\text{Gd@C}_{82}(\text{OH})_{22}$  for 1, 3, 6 days, CCK-8 kits were used to measure the cell viability of hMSCs. Experiments were performed in triplicates. The data was presented as the mean  $\pm$  standard derivation.

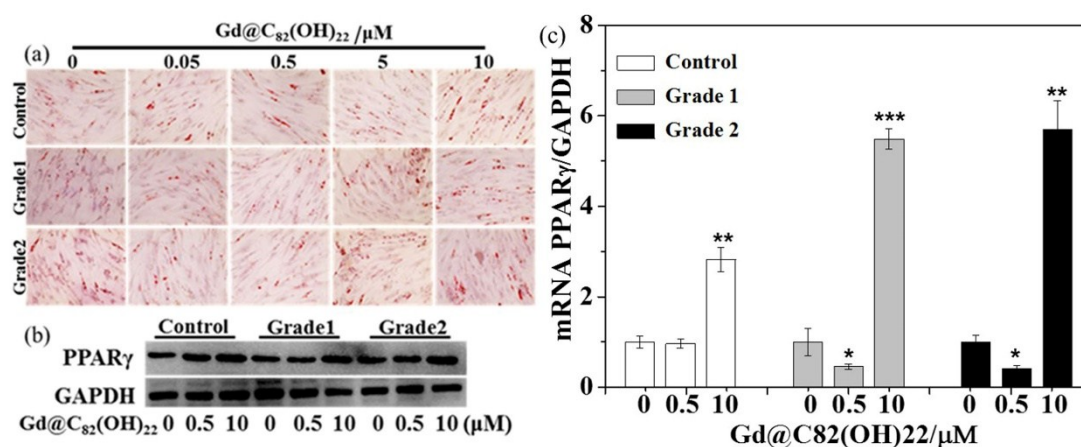

**Figure S3.** The effect of  $\text{Gd@C}_{82}(\text{OH})_{22}$  on adipogenesis of hMSCs in Control (adipogenic induction medium, AIM) and inflammatory microenvironment (dilute CM with AIM 50 (Grade 1) and 20 (Grade 2) folds). **(a)** hMSCs were induced to adipocytes with treatment of 0, 0.05, 0.5, 5 and 10  $\mu\text{M}$   $\text{Gd@C}_{82}(\text{OH})_{22}$  for 10 days, Oil droplets were stained (first row: AIM; second row: Grade 1; third row: Grade 2). **(b)** PPAR $\gamma$  expression was measured by western blotting after adipogenic differentiation 5 days in different microenvironment. **(c)** PPAR $\gamma$  expression was measured by RT-PCR after hMSCs were induced to adipocytes with treatment of 0, 0.5, 10  $\mu\text{M}$   $\text{Gd@C}_{82}(\text{OH})_{22}$  for 5 days. \* $P < 0.05$ ; \*\* $P < 0.01$ ; \*\*\* $P < 0.001$ .

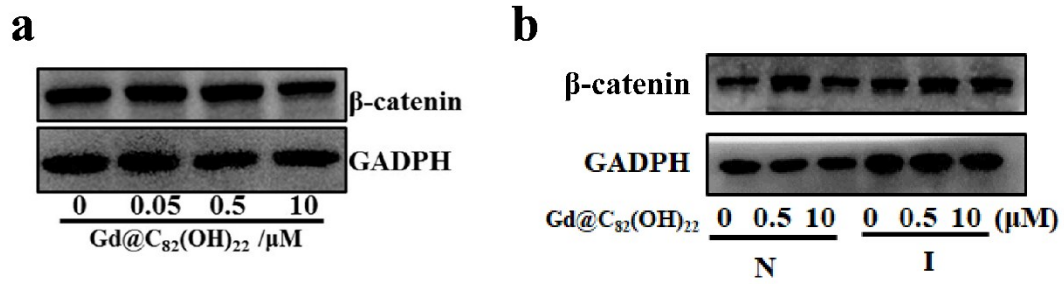

**Figure S4.**  $\text{Gd}@C_{82}(\text{OH})_{22}$  regulates osteogenesis by the  $\beta$ -catenin-independent signaling pathway. (a) After 0.05, 0.5 and 10  $\mu\text{M}$   $\text{Gd}@C_{82}(\text{OH})_{22}$  treatment in normal microenvironment, the expression of  $\beta$ -catenin of hMSCs were analyzed by western blotting. (b) The role of inflammatory cytokines on the  $\beta$ -catenin expression of hMSCs. N: Normal microenvironment; I: inflammatory microenvironment.

**Table S1.** Concentration of main inflammatory factors in inflammatory microenvironment

| Inflammatory microenvironment(pg/ml) |               |               |
|--------------------------------------|---------------|---------------|
| Inflammatory factors                 | Grade 1       | Grade 2       |
| IL-6                                 | 1.3 $\pm$ 0.1 | 3.2 $\pm$ 0.2 |
| TNF- $\alpha$                        | 1.1 $\pm$ 0.1 | 2.6 $\pm$ 0.1 |
| IL-1 $\beta$                         | 1.1 $\pm$ 0.1 | 2.8 $\pm$ 0.1 |
| IL-10                                | 0.3 $\pm$ 0.1 | 0.9 $\pm$ 0.1 |

**Table S2.** Primer of specific osteogenic and adipogenic gene

| Gene                           | Upstream primer            | Downstream primer             |
|--------------------------------|----------------------------|-------------------------------|
| <i>GAPDH</i>                   | 5'-CCTGCACCACCAACTGCTTA-3' | 5'- GGCCATCCACAGTCTTCTGAG-3'  |
| <i>PPAR<math>\gamma</math></i> | 5'-GCGAGGGCGATCTTGACAGG-3' | 5'- TGATCACCTGCAGTAGCTGCAC-3' |
| <i>OCN</i>                     | 5'-GGCTCACCTCCATCACTC-3'   | 5'- TCCAGCACTGTTTATACCCTCT-3' |

*OPN*

5'-CAGATGCTGTGGCCACATGG-3'

5'-GGTGAGACTCATCAGACTGGTGAG-3'
